# Supplementary material
Source: PubMed Central journal article supplement (PMC9086179)
Supplement: NIHMS1790276-supplement-2.pdf [file NIHMS1790276-supplement-2.pdf]

## eSupplement 2. Assessment of chalazia by clinical examination in office

Participant ID: X01-\_\_\_\_ Date of Clinical Exam: \_\_\_\_/\_\_\_\_/\_\_\_\_ PEDIG ID of Clinical Examiner: \_\_\_\_\_

### ASSESSMENT BY CLINICAL EXAM IN OFFICE:

Complete the following for each eyelid:

| IN OFFICE CLINICAL EXAM                                                                                               | Right Upper Lid                                                                                                                                                                                                                                                                  | Right Lower Lid                                                                                                                                                                                                                                                                  | Left Upper Lid                                                                                                                                                                                                                                                                   | Left Lower Lid                                                                                                                                                                                                                                                                   |
|-----------------------------------------------------------------------------------------------------------------------|----------------------------------------------------------------------------------------------------------------------------------------------------------------------------------------------------------------------------------------------------------------------------------|----------------------------------------------------------------------------------------------------------------------------------------------------------------------------------------------------------------------------------------------------------------------------------|----------------------------------------------------------------------------------------------------------------------------------------------------------------------------------------------------------------------------------------------------------------------------------|----------------------------------------------------------------------------------------------------------------------------------------------------------------------------------------------------------------------------------------------------------------------------------|
| 1. Able to assess lid?<br>If not able to assess any lid, why unable?<br>If able to assess at least one lid, continue. | <input type="checkbox"/> Yes <input type="checkbox"/> No                                                                                                                                                                                                                         |
| 2. Are there any <b>chalazia</b> present?<br>a. If YES, # of <b>chalazia</b> on this lid: _____ (#)                   | <input type="checkbox"/> Yes <input type="checkbox"/> No<br>_____ (#)                                                                                                                                                                                                            | <input type="checkbox"/> Yes <input type="checkbox"/> No<br>_____ (#)                                                                                                                                                                                                            | <input type="checkbox"/> Yes <input type="checkbox"/> No<br>_____ (#)                                                                                                                                                                                                            | <input type="checkbox"/> Yes <input type="checkbox"/> No<br>_____ (#)                                                                                                                                                                                                            |
| If at least one <b>chalazia</b> present on the lid, assess the <b>worst chalazion</b> on the lid as follows:          |                                                                                                                                                                                                                                                                                  |                                                                                                                                                                                                                                                                                  |                                                                                                                                                                                                                                                                                  |                                                                                                                                                                                                                                                                                  |
| a) Width of area affected by worst chalazion: _____ (mm)                                                              | _____ (mm)                                                                                                                                                                                                                                                                       | _____ (mm)                                                                                                                                                                                                                                                                       | _____ (mm)                                                                                                                                                                                                                                                                       | _____ (mm)                                                                                                                                                                                                                                                                       |
| b) Location of worst chalazion on lid:<br>I. Horizontal:<br>II. Vertical relative to lid margin:<br>III. Depth:       | <input type="checkbox"/> nasal <input type="checkbox"/> central <input type="checkbox"/> temporal<br><input type="checkbox"/> involves <input type="checkbox"/> approaches <input type="checkbox"/> remote<br><input type="checkbox"/> superficial <input type="checkbox"/> deep | <input type="checkbox"/> nasal <input type="checkbox"/> central <input type="checkbox"/> temporal<br><input type="checkbox"/> involves <input type="checkbox"/> approaches <input type="checkbox"/> remote<br><input type="checkbox"/> superficial <input type="checkbox"/> deep | <input type="checkbox"/> nasal <input type="checkbox"/> central <input type="checkbox"/> temporal<br><input type="checkbox"/> involves <input type="checkbox"/> approaches <input type="checkbox"/> remote<br><input type="checkbox"/> superficial <input type="checkbox"/> deep | <input type="checkbox"/> nasal <input type="checkbox"/> central <input type="checkbox"/> temporal<br><input type="checkbox"/> involves <input type="checkbox"/> approaches <input type="checkbox"/> remote<br><input type="checkbox"/> superficial <input type="checkbox"/> deep |
| c) Does the chalazion have a visible head?                                                                            | <input type="checkbox"/> Yes <input type="checkbox"/> No<br><input type="checkbox"/> Unable to assess                                                                                                                                                                            | <input type="checkbox"/> Yes <input type="checkbox"/> No<br><input type="checkbox"/> Unable to assess                                                                                                                                                                            | <input type="checkbox"/> Yes <input type="checkbox"/> No<br><input type="checkbox"/> Unable to assess                                                                                                                                                                            | <input type="checkbox"/> Yes <input type="checkbox"/> No<br><input type="checkbox"/> Unable to assess                                                                                                                                                                            |
| d) Erythema (color change):                                                                                           | <input type="checkbox"/> No erythema<br><input type="checkbox"/> Mild / moderate<br><input type="checkbox"/> Severe                                                                                                                                                              | <input type="checkbox"/> No erythema<br><input type="checkbox"/> Mild / moderate<br><input type="checkbox"/> Severe                                                                                                                                                              | <input type="checkbox"/> No erythema<br><input type="checkbox"/> Mild / moderate<br><input type="checkbox"/> Severe                                                                                                                                                              | <input type="checkbox"/> No erythema<br><input type="checkbox"/> Mild / moderate<br><input type="checkbox"/> Severe                                                                                                                                                              |
| e) Amount of swelling:                                                                                                | <input type="checkbox"/> None<br><input type="checkbox"/> Mild / moderate<br><input type="checkbox"/> Severe (full lid)                                                                                                                                                          | <input type="checkbox"/> None<br><input type="checkbox"/> Mild / moderate<br><input type="checkbox"/> Severe (full lid)                                                                                                                                                          | <input type="checkbox"/> None<br><input type="checkbox"/> Mild / moderate<br><input type="checkbox"/> Severe (full lid)                                                                                                                                                          | <input type="checkbox"/> None<br><input type="checkbox"/> Mild / moderate<br><input type="checkbox"/> Severe (full lid)                                                                                                                                                          |
| f) Bulbar conjunctiva injection?                                                                                      | <input type="checkbox"/> Yes <input type="checkbox"/> No                                                                                                                                                                                                                         |
| g) Pyogenic granuloma present on palpebral conjunctiva?                                                               | <input type="checkbox"/> Yes <input type="checkbox"/> No                                                                                                                                                                                                                         |
| h) Plugging of meibomian gland?                                                                                       | <input type="checkbox"/> Yes <input type="checkbox"/> No                                                                                                                                                                                                                         |
| i) Inflamed lid margins?                                                                                              | <input type="checkbox"/> Yes <input type="checkbox"/> No                                                                                                                                                                                                                         |
| j) Blepharitis present?                                                                                               | <input type="checkbox"/> Yes <input type="checkbox"/> No                                                                                                                                                                                                                         |
