# Supplementary material
Source: PubMed Central journal article supplement (PMC9086179)
Supplement: NIHMS1790276-supplement-4.pdf [file NIHMS1790276-supplement-4.pdf]

eSupplement 4. Frame of reference examples of the four requested photographs

**Below are examples of the four photos we would like you to take:**

|                                                                                   |                                                                                   |                                                                                    |                                                                                     |
|-----------------------------------------------------------------------------------|-----------------------------------------------------------------------------------|------------------------------------------------------------------------------------|-------------------------------------------------------------------------------------|
|  |  |  |  |
| <b>Eyes Closed</b>                                                                | <b>Eyes Open looking straight ahead</b>                                           | <b>Eyes Open looking up</b>                                                        | <b>Eyelids pulled down<br/>*if child allows</b>                                     |

**You may take more photos than just the above four to show the eyelids better if you would like.**

Below are examples of photos that are **too close** and **too far**:

|                  |                                                                                   |                |                                                                                   |
|------------------|-----------------------------------------------------------------------------------|----------------|-----------------------------------------------------------------------------------|
| <b>Too Close</b> |  | <b>Too Far</b> |  |
|------------------|-----------------------------------------------------------------------------------|----------------|-----------------------------------------------------------------------------------|
