# Supplementary material
Source: PubMed Central journal article supplement (PMC9086179)
Supplement: NIHMS1790276-supplement-5.pdf [file NIHMS1790276-supplement-5.pdf]

eSupplement 5. Clarity of the four requested photographs as assessed by the masked reader

|               | Photo Type  |          |                            |          |                      |          |                            |          | All Photos |          | Overall |        |    |        |    |        |     |        |     |        |     |        |
|---------------|-------------|----------|----------------------------|----------|----------------------|----------|----------------------------|----------|------------|----------|---------|--------|----|--------|----|--------|-----|--------|-----|--------|-----|--------|
|               | Eyes Closed |          | Eyes Open Looking Straight |          | Eyes Open Looking Up |          | Lower Eyelids Pulled Down* |          |            |          |         |        |    |        |    |        |     |        |     |        |     |        |
| Age           | <5 years    | ≥5 years | <5 years                   | ≥5 years | <5 years             | ≥5 years | <5 years                   | ≥5 years | <5 years   | ≥5 years |         |        |    |        |    |        |     |        |     |        |     |        |
| Photo Clarity | N           | (%)      | N                          | (%)      | N                    | (%)      | N                          | (%)      | N          | (%)      | N       | (%)    |    |        |    |        |     |        |     |        |     |        |
| Excellent     | 8           | (27%)    | 16                         | (53%)    | 9                    | (30%)    | 16                         | (53%)    | 10         | (33%)    | 15      | (50%)  | 7  | (26%)  | 15 | (50%)  | 34  | (29%)  | 62  | (52%)  | 96  | (41%)  |
| Good          | 10          | (33%)    | 13                         | (43%)    | 15                   | (50%)    | 12                         | (40%)    | 13         | (43%)    | 13      | (43%)  | 10 | (37%)  | 12 | (40%)  | 48  | (41%)  | 50  | (42%)  | 98  | (41%)  |
| Poor          | 12          | (40%)    | 1                          | (3%)     | 6                    | (20%)    | 2                          | (7%)     | 7          | (23%)    | 2       | (7%)   | 10 | (37%)  | 3  | (10%)  | 35  | (30%)  | 8   | (7%)   | 43  | (18%)  |
| <b>Total</b>  | 30          | (100%)   | 30                         | (100%)   | 30                   | (100%)   | 30                         | (100%)   | 30         | (100%)   | 30      | (100%) | 27 | (100%) | 30 | (100%) | 117 | (100%) | 120 | (100%) | 237 | (100%) |

\*Two parents were unable to take the requested photograph with the lower eyelids pulled down, and the masked reader was unable to assess one additional photograph with the lower eyelids pulled down because of poor image quality.
