# Supplementary material
Source: PubMed Central journal article supplement (PMC9086179)
Supplement: NIHMS1790276-supplement-6.pdf [file NIHMS1790276-supplement-6.pdf]

eSupplement 6. Sensitivity and specificity in subgroups at eyelid level (based on the four requested Photographs)\*

| Chalazion Present               | Remote Photograph Assessment | Clinical Diagnosis (Gold Standard) |     | Sensitivity (95% CI) | Sensitivity Group Difference (95% CI) | Specificity (95% CI) | Specificity Group Difference (95% CI) |
|---------------------------------|------------------------------|------------------------------------|-----|----------------------|---------------------------------------|----------------------|---------------------------------------|
|                                 |                              | Yes                                | No  |                      |                                       |                      |                                       |
| <b>Age</b>                      |                              |                                    |     |                      |                                       |                      |                                       |
| <5 Years Old                    | Yes                          | 34                                 | 3   | 81%                  | 2%<br>(-12%, 16%)                     | 96%<br>(89%, 99%)    | 3%<br>(-2%, 7%)                       |
|                                 | No                           | 8                                  | 75  | (70%, 88%)           |                                       |                      |                                       |
| ≥ 5 Years Old                   | Yes                          | 34                                 | 1   | 79%                  | (-12%, 16%)                           | 99%<br>(92% to >99%) | (-2%, 7%)                             |
|                                 | No                           | 9                                  | 76  | (66%, 88%)           |                                       |                      |                                       |
| <b>Eyelid Affected</b>          |                              |                                    |     |                      |                                       |                      |                                       |
| Lower                           | Yes                          | 27                                 | 2   | 82%                  | 3%<br>(-13%, 19%)                     | 98%<br>(91% to 99%)  | 1%<br>(-4%, 6%)                       |
|                                 | No                           | 6                                  | 85  | (66% to 91%)         |                                       |                      |                                       |
| Upper                           | Yes                          | 41                                 | 2   | 79%                  | (-13%, 19%)                           | 97%<br>(89% to 99%)  | (-4%, 6%)                             |
|                                 | No                           | 11                                 | 66  | (66% to 88%)         |                                       |                      |                                       |
| <b>Photo Clarity</b>            |                              |                                    |     |                      |                                       |                      |                                       |
| All Photos Sufficient           | Yes                          | 44                                 | 2   | 83%                  | 8%<br>(-6%, 22%)                      | 98%<br>(93% to >99%) | 2%<br>(-4%, 8%)                       |
|                                 | No                           | 9                                  | 105 | (72% to 90%)         |                                       |                      |                                       |
| One or More Photos Insufficient | Yes                          | 24                                 | 2   | 75%                  | (-6%, 22%)                            | 96%<br>(86% to 99%)  | (-4%, 8%)                             |
|                                 | No                           | 8                                  | 46  | (62% to 84%)         |                                       |                      |                                       |
| <b>Frame of Reference</b>       |                              |                                    |     |                      |                                       |                      |                                       |
| Complied as Instructed          | Yes                          | 34                                 | 1   | 87%                  | 13%<br>(-1%, 27%)                     | 99%<br>(92% to >99%) | 3%<br>(-2%, 8%)                       |
|                                 | No                           | 5                                  | 84  | (72% to 95%)         |                                       |                      |                                       |
| Did NOT Comply as Instructed    | Yes                          | 34                                 | 3   | 74%                  | (-1%, 27%)                            | 96%<br>(88% to 99%)  | (-2%, 8%)                             |
|                                 | No                           | 12                                 | 67  | (64% to 82%)         |                                       |                      |                                       |

| Chalazion Present          | Remote Photograph Assessment | Clinical Diagnosis (Gold Standard) |    | Sensitivity (95% CI) | Sensitivity Group Difference (95% CI) | Specificity (95% CI) | Specificity Group Difference (95% CI) |    |    |
|----------------------------|------------------------------|------------------------------------|----|----------------------|---------------------------------------|----------------------|---------------------------------------|----|----|
|                            |                              | Yes                                | No |                      |                                       |                      |                                       |    |    |
| <b>Chalazion Width</b>     |                              |                                    |    |                      |                                       |                      |                                       |    |    |
| 2 to <5mm                  | Yes                          | 19                                 | NA | 63%<br>(46% to 78%)  | 26%<br>(8%, 44%)                      | NA                   | NA                                    |    |    |
|                            | No                           | 11                                 | NA |                      |                                       |                      |                                       |    |    |
| ≥5mm                       | Yes                          | 49                                 | NA | 89%<br>(79% to 95%)  |                                       |                      |                                       |    |    |
|                            | No                           | 6                                  | NA |                      |                                       |                      |                                       |    |    |
| <b>Chalazion Depth</b>     |                              |                                    |    |                      |                                       |                      |                                       |    |    |
| Superficial                | Yes                          | 34                                 | NA | 94%<br>(80% to 99%)  | 25%<br>(12%, 38%)                     | NA                   | NA                                    |    |    |
|                            | No                           | 2                                  | NA |                      |                                       |                      |                                       |    |    |
| Deep                       | Yes                          | 34                                 | NA | 69%<br>(58% to 79%)  |                                       |                      |                                       |    |    |
|                            | No                           | 15                                 | NA |                      |                                       |                      |                                       |    |    |
| <b>Vertical Position</b>   |                              |                                    |    |                      |                                       |                      |                                       |    |    |
| Approaching Eyelid Margin  | Yes                          | 43                                 | NA | 84%<br>(73% to 91%)  | Reference Group                       | NA                   | NA                                    |    |    |
|                            | No                           | 8                                  | NA |                      |                                       |                      |                                       |    |    |
| Involving Eyelid Margin    | Yes                          | 16                                 | NA | 89%<br>(66% to 97%)  |                                       | 5%<br>(-12%, 21%)    |                                       | NA | NA |
|                            | No                           | 2                                  | NA |                      |                                       |                      |                                       |    |    |
| Remote from Eyelid Margin  | Yes                          | 9                                  | NA | 56%<br>(34% to 76%)  | 28%<br>(4%, 52%)                      |                      | NA                                    |    |    |
|                            | No                           | 7                                  | NA |                      |                                       |                      |                                       |    |    |
| <b>Horizontal Position</b> |                              |                                    |    |                      |                                       |                      |                                       |    |    |
| Central                    | Yes                          | 35                                 | NA | 81%<br>(68% to 90%)  |                                       | Reference Group      | NA                                    | NA |    |
|                            | No                           | 8                                  | NA |                      |                                       |                      |                                       |    |    |
| Nasal                      | Yes                          | 13                                 | NA | 72%                  | 9%                                    |                      | NA                                    |    |    |

| Chalazion Present | Remote Photograph Assessment | Clinical Diagnosis (Gold Standard) |    | Sensitivity (95% CI) | Sensitivity Group Difference (95% CI) | Specificity (95% CI) | Specificity Group Difference (95% CI) |
|-------------------|------------------------------|------------------------------------|----|----------------------|---------------------------------------|----------------------|---------------------------------------|
|                   |                              | Yes                                | No |                      |                                       |                      |                                       |
|                   | No                           | 5                                  | NA | (49% to 88%)         | (-14%, 32%)                           |                      |                                       |
| Temporal          | Yes                          | 20                                 | NA | 83%                  | 2%                                    | NA                   |                                       |
|                   | No                           | 4                                  | NA | (65% to 93%)         | (-16%, 20%)                           |                      |                                       |

\* Based on the largest chalazion if more than one was present on a single eyelid.
